# Supplementary material for: Breakthrough Mucormycosis After Hematopoietic Stem Cell Transplantation: A Retrospective Multiyear Cohort Study in Eastern China
Source: Research Square preprint supplement (doi:10.21203/rs.3.rs-8122974/v1), 2026-02-22
Supplement: Supplementary file 1 [file 6c4003f8ca2a1c879a1082c6.docx]

Supplementary Table S1. Univariable Cox regression analysis of mucormycosis risk factors in allogeneic HSCT recipients

| |  | **Univariable analysis for mucormycosis** | | | | | | | --- | --- | --- | --- | --- | --- | --- | | **Risk factors** | **No. of patients** | **mucormycosis** | | **HR** | **95 % CI** | ***P*-value** | | ***n*** | **%** | | Gender |  |  |  |  |  |  | | male | 587 | 31 | 5.3 |  |  |  | | female | 403 | 17 | 4.2 | 1.24 | 0.69 - 2.24 | 0.477 | | Underlying disease |  |  |  |  |  |  | | AML | 368 | 17 | 4.6 | 0.94 | 0.52 - 1.70 | 0.836 | | MDS | 127 | 14 | 11.0 | 2.97 | 1.59 - 5.53 | 0.001 | | Concomitant disease |  |  |  |  |  |  | | Diabetes | 80 | 9 | 11.3 |  |  |  | | No Diabetes | 910 | 39 | 4.3 | 2.87 | 1 .39 - 5.92 | 0.004 | | chronic hepatitis B | 32 | 4 | 12.5 |  |  |  | | No chronic hepatitis B | 958 | 44 | 4.6 | 2.89 | 1.03 - 8.01 | 0.043 | | Previous IFD |  |  |  |  |  |  | | Yes | 136 | 14 | 10.3 |  |  |  | | No | 854 | 34 | 4.0 | 2.88 | 1.55 - 5.38 | 0.001 | | Primary controlled |  |  |  |  |  |  | | Controlled | 641 | 28 | 4.2 |  |  |  | | Uncontrolled | 332 | 19 | 6.0 | 1.29 | 0.77 - 2.16 | 0.343 | | Congenital disease | 17 | 1 | 5.9 |  |  |  | | Transplant type |  |  |  |  |  |  | | CBT | 795 | 34 | 4.4 |  |  |  | | PBSCT | 192 | 14 | 6.1 | 1.64 | 0.89 - 3.01 | 0.114 | | Other | 3 |  |  |  |  |  | | HLA-matched donor |  |  |  |  |  |  | | HLA-matched | 187 | 12 | 6.4 |  |  |  | | HLA-mismatched | 803 | 36 | 4.5 | 0.74 | 0.39 - 1.43 | 0.373 | | Conditioning regimen |  |  |  |  |  |  | | MA | 809 | 39 | 4.8 |  |  |  | | RIC/NMA | 181 | 9 | 5.0 | 0.96 | 0.46 - 1.97 | 0.904 | | Use of ATG in Conditioning |  |  |  |  |  |  | | Yes | 125 | 8 | 6.4 |  |  |  | | No | 865 | 40 | 4.6 | 1.20 | 0.57 - 1.22 | 0.349 | | Acute GvHD |  |  |  |  |  |  | | severeGvHD | 201 | 24 | 11.9 |  |  |  | | None or grade I–IIGvHD | 789 | 24 | 3.0 | 4.57 | 2.59 - 8.06 | 0.001 | | Chronic GvHD |  |  |  |  |  |  | | severe GvHD | 43 | 3 | 7.0 |  |  |  | | None or grade I–IIGvHD | 947 | 45 | 4.8 | 1.39 | 0.432 - 4.47 | 0.582 | | SR-aGVHD |  |  |  |  |  |  | | Yes | 185 | 20 | 10.8 |  |  |  | | No | 805 | 28 | 3.5 | 3.34 | 1.88 - 5.94 | 0.001 | | Delayed Neutrophil Recovery (>15 Days vs. ≤15 Days)a |  |  |  |  |  |  | | Yes | 567 | 31 | 5.5 |  |  |  | | No | 423 | 17 | 4.0 | 1.44 | 0.80 - 2.61 | 0.224 | | Prolonged severe neutropenia (>30 Days vs. ≤30 Days) |  |  |  |  |  |  | | Yes | 337 | 22 | 6.5 |  |  |  | | No | 653 | 26 | 4.0 | 0.87 | 0.12 - 6.31 | 0.891 | | Antifungal prophylaxis |  |  |  |  |  |  | | Posaconazole |  |  |  |  |  |  | | Yes | 269 | 11 |  |  |  |  | | No | 721 | 37 |  | 0.86 | 0.44 - 1.68 | 0.413 | | Voriconazole |  |  |  |  |  |  | | Yes | 569 | 29 |  |  |  |  | | No | 421 | 19 | 5.1 | 1.48 | 0.81 - 2.71 | 0.317 | |
| --- | --- | --- | --- | --- | --- | --- | --- | --- | --- | --- | --- | --- | --- | --- | --- | --- | --- | --- | --- | --- | --- | --- | --- | --- | --- | --- | --- | --- | --- | --- | --- | --- | --- | --- | --- | --- | --- | --- | --- | --- | --- | --- | --- | --- | --- | --- | --- | --- | --- | --- | --- | --- | --- | --- | --- | --- | --- | --- | --- | --- | --- | --- | --- | --- | --- | --- | --- | --- | --- | --- | --- | --- | --- | --- | --- | --- | --- | --- | --- | --- | --- | --- | --- | --- | --- | --- | --- | --- | --- | --- | --- | --- | --- | --- | --- | --- | --- | --- | --- | --- | --- | --- | --- | --- | --- | --- | --- | --- | --- | --- | --- | --- | --- | --- | --- | --- | --- | --- | --- | --- | --- | --- | --- | --- | --- | --- | --- | --- | --- | --- | --- | --- | --- | --- | --- | --- | --- | --- | --- | --- | --- | --- | --- | --- | --- | --- | --- | --- | --- | --- | --- | --- | --- | --- | --- | --- | --- | --- | --- | --- | --- | --- | --- | --- | --- | --- | --- | --- | --- | --- | --- | --- | --- | --- | --- | --- | --- | --- | --- | --- | --- | --- | --- | --- | --- | --- | --- | --- | --- | --- | --- | --- | --- | --- | --- | --- | --- | --- | --- | --- | --- | --- | --- | --- | --- | --- | --- | --- | --- | --- | --- | --- | --- | --- | --- | --- | --- | --- | --- | --- | --- | --- | --- | --- | --- | --- | --- | --- | --- | --- | --- | --- | --- | --- | --- | --- | --- | --- | --- | --- | --- | --- | --- | --- | --- | --- | --- | --- | --- | --- | --- | --- | --- | --- | --- | --- | --- | --- | --- | --- | --- | --- | --- | --- | --- | --- | --- | --- | --- | --- | --- | --- | --- | --- | --- | --- | --- | --- | --- | --- | --- | --- | --- | --- | --- | --- | --- | --- | --- | --- | --- | --- | --- | --- | --- | --- | --- | --- | --- | --- | --- | --- | --- | --- | --- | --- | --- | --- | --- | --- | --- | --- | --- | --- | --- | --- | --- | --- | --- | --- | --- | --- | --- | --- | --- | --- | --- | --- | --- | --- | --- | --- | --- | --- | --- | --- | --- | --- | --- | --- | --- | --- | --- | --- | --- | --- | --- | --- | --- | --- | --- | --- | --- | --- | --- | --- | --- | --- | --- | --- | --- | --- | --- | --- | --- | --- | --- | --- | --- | --- | --- | --- | --- | --- | --- | --- | --- | --- | --- | --- | --- | --- | --- | --- | --- | --- | --- |
|

aDelayed neutrophil recovery was defined as time to neutrophil engraftment exceeding the cohort median (15 days).

Abbreviations: HR, hazard ratio; CI, confidence interval; AML, acute myelocytic leukemia; MDS, myelodysplastic syndrome; HSCT, hematopoietic stem cell transplant; PBSCT, peripheral blood stem cell transplantation; CBT, cord blood transplantation; HLA, human leukocyte antigen; RIC, reduced-intensity conditioning; NMA, non-myeloablative conditioning; GvHD, graft-versus-host disease; ATG, anti-thymocyte globulin, SR-aGVHD, Steroid-refractory acute graft-versus-host disease.

.
